# Supplementary material for: Multilevel analysis of personality, family, and classroom influences on emotional and behavioral problems among Chinese adolescent students
Source: PubMed Central journal article supplement (PMC6084894; doi:10.1371/journal.pone.0201442), 2018-08-09
Supplement: pone.0201442.s002.pdf [file pone.0201442.s002.pdf]

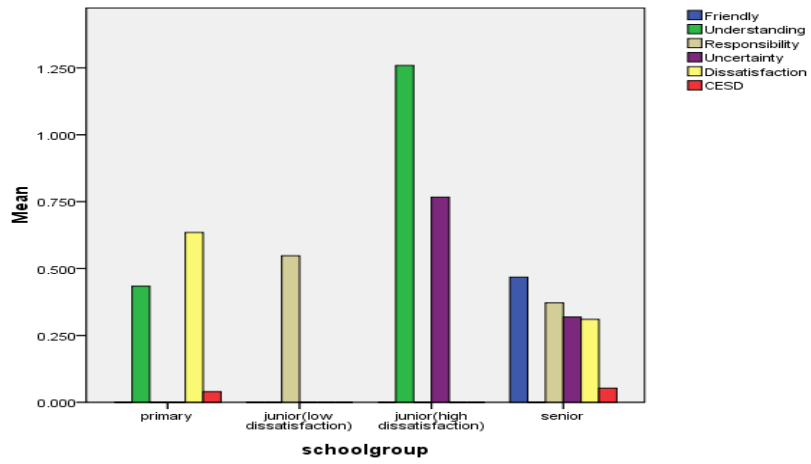

Figure 2. The bar of the class fixed effects on SDQ in each school group  
 CESD: Depressive symptoms
