# Supplementary material for: Multilevel analysis of personality, family, and classroom influences on emotional and behavioral problems among Chinese adolescent students
Source: PubMed Central journal article supplement (PMC6084894; doi:10.1371/journal.pone.0201442), 2018-08-09
Supplement: pone.0201442.s003.pdf [file pone.0201442.s003.pdf]

1 Supplementary Table1 Correlations among all the analytical variables used in the regression model in primary school

|     | E        | P        | N        | L        | F1       | F2       | F3       | F4       | F5       | F6       | F7      | Q1       | Q2       | Q3      | Q4       | Q5       | Q6      | Q7      | Q8     |
|-----|----------|----------|----------|----------|----------|----------|----------|----------|----------|----------|---------|----------|----------|---------|----------|----------|---------|---------|--------|
| E   | 1        |          |          |          |          |          |          |          |          |          |         |          |          |         |          |          |         |         |        |
| P   | -0.158** | 1        |          |          |          |          |          |          |          |          |         |          |          |         |          |          |         |         |        |
| N   | -0.065** | 0.581**  | 1        |          |          |          |          |          |          |          |         |          |          |         |          |          |         |         |        |
| L   | 0.277**  | -0.454** | -0.422** | 1        |          |          |          |          |          |          |         |          |          |         |          |          |         |         |        |
| F1  | 0.323**  | -0.430** | -0.329** | 0.351**  | 1        |          |          |          |          |          |         |          |          |         |          |          |         |         |        |
| F2  | -0.163** | 0.373**  | 0.364**  | -0.325** | -0.529** | 1        |          |          |          |          |         |          |          |         |          |          |         |         |        |
| F3  | 0.202**  | -0.080** | -0.009   | 0.086**  | 0.248**  | -0.025   | 1        |          |          |          |         |          |          |         |          |          |         |         |        |
| F4  | 0.260**  | -0.146** | -0.205** | 0.284**  | 0.263**  | -0.186** | 0.119**  | 1        |          |          |         |          |          |         |          |          |         |         |        |
| F5  | 0.248**  | -0.082** | -0.160** | 0.187**  | 0.186**  | -0.127** | 0.025    | 0.547**  | 1        |          |         |          |          |         |          |          |         |         |        |
| F6  | 0.262**  | -0.324** | -0.298** | 0.400**  | 0.554**  | -0.364** | 0.255**  | 0.334**  | 0.207**  | 1        |         |          |          |         |          |          |         |         |        |
| F7  | 0.065**  | 0.003    | -0.062** | 0.184**  | 0.114**  | 0.021    | 0.186**  | 0.204**  | 0.089**  | 0.346**  | 1       |          |          |         |          |          |         |         |        |
| Q1  | 0.159**  | -0.115** | -0.113** | 0.145**  | 0.165**  | -0.089** | 0.087**  | 0.155**  | 0.158**  | 0.147**  | 0.019   | 1        |          |         |          |          |         |         |        |
| Q2  | 0.157**  | -0.168** | -0.138** | 0.183**  | 0.208**  | -0.144** | 0.060**  | 0.132**  | 0.121**  | 0.174**  | -0.004  | 0.616**  | 1        |         |          |          |         |         |        |
| Q3  | -0.074** | 0.217**  | 0.136**  | -0.125** | -0.134** | 0.066**  | -0.058** | -0.014   | 0.007    | -0.093** | 0.006   | -0.102** | -0.135** | 1       |          |          |         |         |        |
| Q4  | -0.032   | 0.194**  | 0.211**  | -0.196** | -0.133** | 0.104**  | -0.015   | -0.064** | -0.089** | -0.124** | -0.042  | -0.117** | -0.316** | 0.281** | 1        |          |         |         |        |
| Q5  | 0.211**  | -0.131** | -0.146** | 0.182**  | 0.226**  | -0.161** | 0.094**  | 0.202**  | 0.194**  | 0.209**  | 0.037   | 0.487**  | 0.529**  | -0.045* | -0.194** | 1        |         |         |        |
| Q6  | 0.084**  | -0.005   | -0.054*  | 0.080**  | 0.080**  | -0.039   | 0.027    | 0.125**  | 0.142**  | 0.079**  | 0.000   | 0.303**  | 0.301**  | 0.166** | -0.048*  | 0.576**  | 1       |         |        |
| Q7  | -0.174** | 0.287**  | 0.211**  | -0.271** | -0.243** | 0.206**  | -0.060** | -0.102** | -0.097** | -0.232** | -0.042  | -0.224** | -0.370** | 0.348** | 0.442**  | -0.338** | -0.050* | 1       |        |
| Q8  | 0.077**  | 0.040    | 0.011    | 0.001    | 0.030    | -0.008   | 0.135**  | 0.048*   | -0.005   | 0.054*   | 0.081** | 0.222**  | 0.121**  | -0.028  | 0.138**  | 0.180**  | 0.054*  | 0.117** | 1      |
| SDQ | -0.304** | 0.520**  | 0.598**  | -0.493** | -0.412** | 0.346**  | -0.095** | -0.240** | -0.158** | -0.374** | -0.056* | -0.188** | -0.213** | 0.179** | 0.208**  | -0.203** | -0.023  | 0.335** | -0.003 |

2 E: Extraversion; P: Psychoticism; N: Neuroticism; L: Lie;

3 F1 : Cohesion; F2: Conflict; F3: Achievement; F4: Intellectual-Cultural; F5: Active-Recreational; F6: Organization; F7: Control

4 Q1: Leadership; Q2: Understanding ; Q3: Uncertainty; Q4: Admonishing behavior ; Q5: Helpful/Friendly; Q6: Student Responsibility/Freedom ;

5 Q7: Dissatisfaction ; Q8: Strict behavior;
