# Supplementary material for: Multilevel analysis of personality, family, and classroom influences on emotional and behavioral problems among Chinese adolescent students
Source: PubMed Central journal article supplement (PMC6084894; doi:10.1371/journal.pone.0201442), 2018-08-09
Supplement: pone.0201442.s004.pdf [file pone.0201442.s004.pdf]

1 Supplementary Table2 Correlations among all the analytical variables used in the regression model in junior high school

|     | E        | P        | N        | L        | F1       | F2       | F3       | F4       | F5       | F6       | F7      | Q1       | Q2       | Q3       | Q4       | Q5       | Q6       | Q7      | Q8     |
|-----|----------|----------|----------|----------|----------|----------|----------|----------|----------|----------|---------|----------|----------|----------|----------|----------|----------|---------|--------|
| E   | 1        |          |          |          |          |          |          |          |          |          |         |          |          |          |          |          |          |         |        |
| P   | -0.111** | 1        |          |          |          |          |          |          |          |          |         |          |          |          |          |          |          |         |        |
| N   | -0.088** | 0.578**  | 1        |          |          |          |          |          |          |          |         |          |          |          |          |          |          |         |        |
| L   | 0.201**  | -0.452** | -0.417** | 1        |          |          |          |          |          |          |         |          |          |          |          |          |          |         |        |
| F1  | 0.281**  | -0.439** | -0.341** | 0.351**  | 1        |          |          |          |          |          |         |          |          |          |          |          |          |         |        |
| F2  | -0.150** | 0.388**  | 0.380**  | -0.360** | -0.590** | 1        |          |          |          |          |         |          |          |          |          |          |          |         |        |
| F3  | 0.173**  | -0.077** | -0.050*  | 0.158**  | 0.287**  | -0.113** | 1        |          |          |          |         |          |          |          |          |          |          |         |        |
| F4  | 0.275**  | -0.145** | -0.233** | 0.318**  | 0.344**  | -0.239** | 0.202**  | 1        |          |          |         |          |          |          |          |          |          |         |        |
| F5  | 0.300**  | -0.097** | -0.141** | 0.173**  | 0.277**  | -0.213** | 0.062**  | 0.510**  | 1        |          |         |          |          |          |          |          |          |         |        |
| F6  | 0.218**  | -0.321** | -0.352** | 0.430**  | 0.531**  | -0.425** | 0.284**  | 0.362**  | 0.223**  | 1        |         |          |          |          |          |          |          |         |        |
| F7  | 0.028    | 0.107**  | -0.021   | 0.108**  | -0.010   | 0.051*   | 0.240**  | 0.143**  | 0.028    | 0.259**  | 1       |          |          |          |          |          |          |         |        |
| Q1  | 0.144**  | -0.201** | -0.198** | 0.257**  | 0.278**  | -0.179** | 0.108**  | 0.187**  | 0.105**  | 0.226**  | 0.010   | 1        |          |          |          |          |          |         |        |
| Q2  | 0.135**  | -0.250** | -0.245** | 0.282**  | 0.323**  | -0.241** | 0.090**  | 0.214**  | 0.129**  | 0.261**  | -0.013  | 0.722**  | 1        |          |          |          |          |         |        |
| Q3  | -0.072** | 0.267**  | 0.203**  | -0.177** | -0.183** | 0.190**  | -0.013   | -0.054*  | -0.044*  | -0.157** | 0.061** | -0.220** | -0.237** | 1        |          |          |          |         |        |
| Q4  | -0.093** | 0.241**  | 0.258**  | -0.264** | -0.255** | 0.262**  | -0.048*  | -0.192** | -0.148** | -0.234** | 0.010   | -0.316** | -0.486** | 0.399**  | 1        |          |          |         |        |
| Q5  | 0.203**  | -0.221** | -0.212** | 0.253**  | 0.289**  | -0.214** | 0.099**  | 0.218**  | 0.179**  | 0.229**  | -0.021  | 0.615**  | 0.686**  | -0.184** | -0.459** | 1        |          |         |        |
| Q6  | 0.106**  | -0.079** | -0.099** | 0.108**  | 0.163**  | -0.088** | 0.065**  | 0.151**  | 0.132**  | 0.117**  | -0.003  | 0.382**  | 0.457**  | 0.070**  | -0.267** | 0.641**  | 1        |         |        |
| Q7  | -0.135** | 0.324**  | 0.297**  | -0.282** | -0.330** | 0.325**  | -0.057** | -0.185** | -0.139** | -0.256** | 0.038   | -0.392** | -0.525** | 0.417**  | 0.656**  | -0.529** | -0.232** | 1       |        |
| Q8  | 0.076**  | -0.041   | -0.008   | 0.051*   | 0.086**  | -0.022   | 0.106**  | 0.040    | -0.024   | 0.092**  | 0.060** | 0.223**  | 0.145**  | -0.025   | 0.135**  | 0.150**  | 0.071**  | 0.119** | 1      |
| SDQ | -0.263** | 0.553**  | 0.661**  | -0.465** | -0.402** | 0.387**  | -0.103** | -0.248** | -0.195** | -0.354** | 0.036   | -0.241** | -0.265** | 0.266**  | 0.257**  | -0.272** | -0.110** | 0.349** | -0.039 |

2 E: Extraversion; P: Psychoticism; N: Neuroticism; L: Lie;

3 F1 : Cohesion; F2: Conflict; F3: Achievement; F4: Intellectual-Cultural; F5: Active-Recreational; F6: Organization; F7: Control

4 Q1: Leadership; Q2: Understanding ; Q3: Uncertainty; Q4: Admonishing behavior ; Q5: Helpful/Friendly; Q6: Student Responsibility/Freedom ;

5 Q7: Dissatisfaction ; Q8: Strict behavior;
