# Supplementary material for: Multilevel analysis of personality, family, and classroom influences on emotional and behavioral problems among Chinese adolescent students
Source: PubMed Central journal article supplement (PMC6084894; doi:10.1371/journal.pone.0201442), 2018-08-09
Supplement: pone.0201442.s005.pdf [file pone.0201442.s005.pdf]

1 Supplementary Table 3 Correlations among all the analytical variables used in the regression model in senior high school

|     | E        | P        | N        | L        | F1       | F2       | F3       | F4       | F5       | F6       | F7      | Q1       | Q2       | Q3       | Q4       | Q5       | Q6       | Q7      | Q8       |
|-----|----------|----------|----------|----------|----------|----------|----------|----------|----------|----------|---------|----------|----------|----------|----------|----------|----------|---------|----------|
| E   | 1        |          |          |          |          |          |          |          |          |          |         |          |          |          |          |          |          |         |          |
| P   | -0.096** | 1        |          |          |          |          |          |          |          |          |         |          |          |          |          |          |          |         |          |
| N   | -0.042   | 0.470**  | 1        |          |          |          |          |          |          |          |         |          |          |          |          |          |          |         |          |
| L   | 0.096**  | -0.375** | -0.384** | 1        |          |          |          |          |          |          |         |          |          |          |          |          |          |         |          |
| F1  | 0.207**  | -0.384** | -0.322** | 0.263**  | 1        |          |          |          |          |          |         |          |          |          |          |          |          |         |          |
| F2  | -0.098** | 0.313**  | 0.410**  | -0.274** | -0.580** | 1        |          |          |          |          |         |          |          |          |          |          |          |         |          |
| F3  | 0.152**  | -0.052   | -0.022   | 0.185**  | 0.243**  | -0.093** | 1        |          |          |          |         |          |          |          |          |          |          |         |          |
| F4  | 0.206**  | -0.032   | -0.213** | 0.282**  | 0.271**  | -0.218** | 0.207**  | 1        |          |          |         |          |          |          |          |          |          |         |          |
| F5  | 0.297**  | -0.052   | -0.178** | 0.137**  | 0.253**  | -0.143** | 0.128**  | 0.514**  | 1        |          |         |          |          |          |          |          |          |         |          |
| F6  | 0.212**  | -0.230** | -0.335** | 0.384**  | 0.451**  | -0.364** | 0.311**  | 0.350**  | 0.257**  | 1        |         |          |          |          |          |          |          |         |          |
| F7  | 0.021    | 0.115**  | -0.041   | 0.168**  | 0.019    | -0.036   | 0.220**  | 0.232**  | 0.082**  | 0.337**  | 1       |          |          |          |          |          |          |         |          |
| Q1  | 0.109**  | -0.290** | -0.214** | 0.214**  | 0.300**  | -0.183** | 0.151**  | 0.111**  | 0.101**  | 0.251**  | 0.013   | 1        |          |          |          |          |          |         |          |
| Q2  | 0.084**  | -0.317** | -0.240** | 0.214**  | 0.305**  | -0.192** | 0.125**  | 0.106**  | 0.080**  | 0.215**  | -0.015  | 0.736**  | 1        |          |          |          |          |         |          |
| Q3  | -0.068*  | 0.251**  | 0.146**  | -0.123** | -0.187** | 0.097**  | -0.062*  | -0.058*  | -0.031   | -0.144** | 0.048   | -0.341** | -0.342** | 1        |          |          |          |         |          |
| Q4  | -0.014   | 0.226**  | 0.235**  | -0.234** | -0.212** | 0.200**  | -0.045   | -0.135** | -0.059*  | -0.176** | -0.050  | -0.360** | -0.558** | 0.410**  | 1        |          |          |         |          |
| Q5  | 0.080**  | -0.237** | -0.223** | 0.213**  | 0.295**  | -0.204** | 0.153**  | 0.208**  | 0.133**  | 0.226**  | 0.028   | 0.621**  | 0.681**  | -0.216** | -0.516** | 1        |          |         |          |
| Q6  | -0.014   | -0.098** | -0.136** | 0.138**  | 0.166**  | -0.126** | 0.095**  | 0.167**  | 0.087**  | 0.127**  | 0.072** | 0.419**  | 0.486**  | 0.040    | -0.341** | 0.674**  | 1        |         |          |
| Q7  | -0.108** | 0.362**  | 0.197**  | -0.197** | -0.326** | 0.232**  | -0.070*  | -0.090** | -0.077** | -0.192** | 0.062*  | -0.402** | -0.544** | 0.434**  | 0.655**  | -0.526** | -0.257** | 1       |          |
| Q8  | 0.094**  | -0.079** | -0.070*  | 0.121**  | 0.083**  | -0.055*  | 0.094**  | 0.043    | 0.049    | 0.157**  | 0.074** | 0.298**  | 0.167**  | -0.055*  | 0.139**  | 0.151**  | 0.035    | 0.079** | 1        |
| SDQ | -0.275** | 0.518**  | 0.626**  | -0.415** | -0.389** | 0.360**  | -0.089** | -0.183** | -0.176** | -0.352** | -0.031  | -0.253** | -0.269** | 0.243**  | 0.244**  | -0.226** | -0.084** | 0.307** | -0.095** |

2 E: Extraversion; P: Psychoticism; N: Neuroticism; L: Lie;

3 F1 : Cohesion; F2: Conflict; F3: Achievement; F4: Intellectual-Cultural; F5: Active-Recreational; F6: Organization; F7: Control

4 QI: Leadership; Q2: Understanding ; Q3: Uncertainty; Q4: Admonishing behavior ; Q5: Helpful/Friendly; Q6: Student Responsibility/Freedom ;

5 Q7: Dissatisfaction ; Q8: Strict behavior
